# Supplementary material
Source: PubMed Central journal article supplement (PMC4391372)

## Supporting Information for

### ***In vitro* Evaluation of Flavonoids from *Eriodictyon californicum* for Antagonist Activity Against the Bitterness Receptor hTAS2R31**

Joshua N. Fletcher,<sup>†</sup> A. Douglas Kinghorn,<sup>\*,†</sup> Jay P. Slack,<sup>‡</sup> T. Scott McCluskey,<sup>‡</sup> Amy Odley,<sup>‡</sup> and Zhonghua Jia<sup>‡</sup>

<sup>†</sup>Division of Medicinal Chemistry and Pharmacognosy, College of Pharmacy, The Ohio State University, 500 W. 12<sup>th</sup> Ave., Columbus, OH 43210

<sup>‡</sup>Givaudan Flavors Corporation, 1199 Edison Dr., Cincinnati, OH 45216

\*Corresponding author. Tel: (614) 247-8094. Fax: (614) 247-8119. E-mail: kinghorn.4@osu.edu

Figure S1a.  $^1\text{H}$  NMR Spectrum of 8.

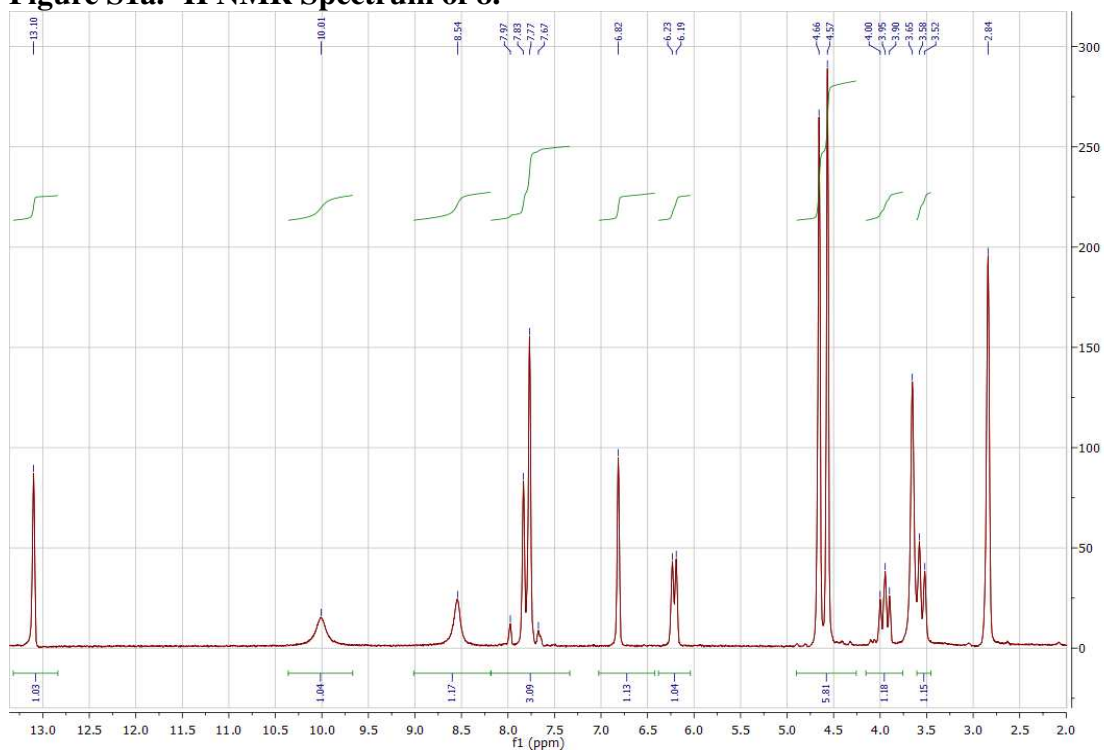

Figure S1b.  $^{13}\text{C}$  NMR Spectrum of 8.

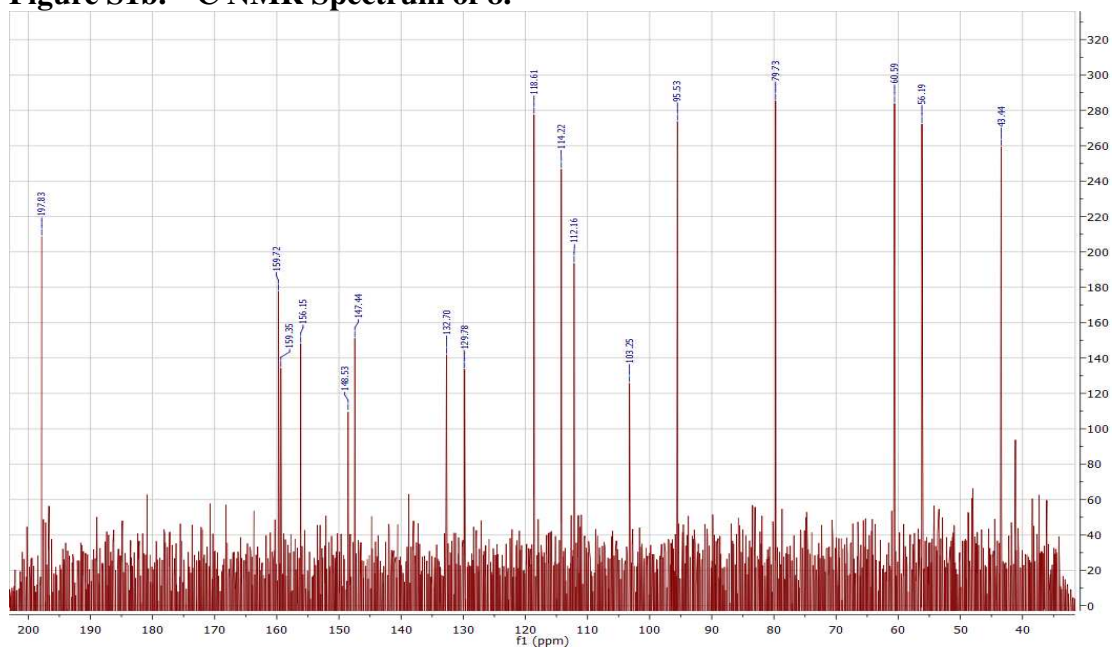

**Figure S1c. HMBC Correlation Spectrum of 8.**

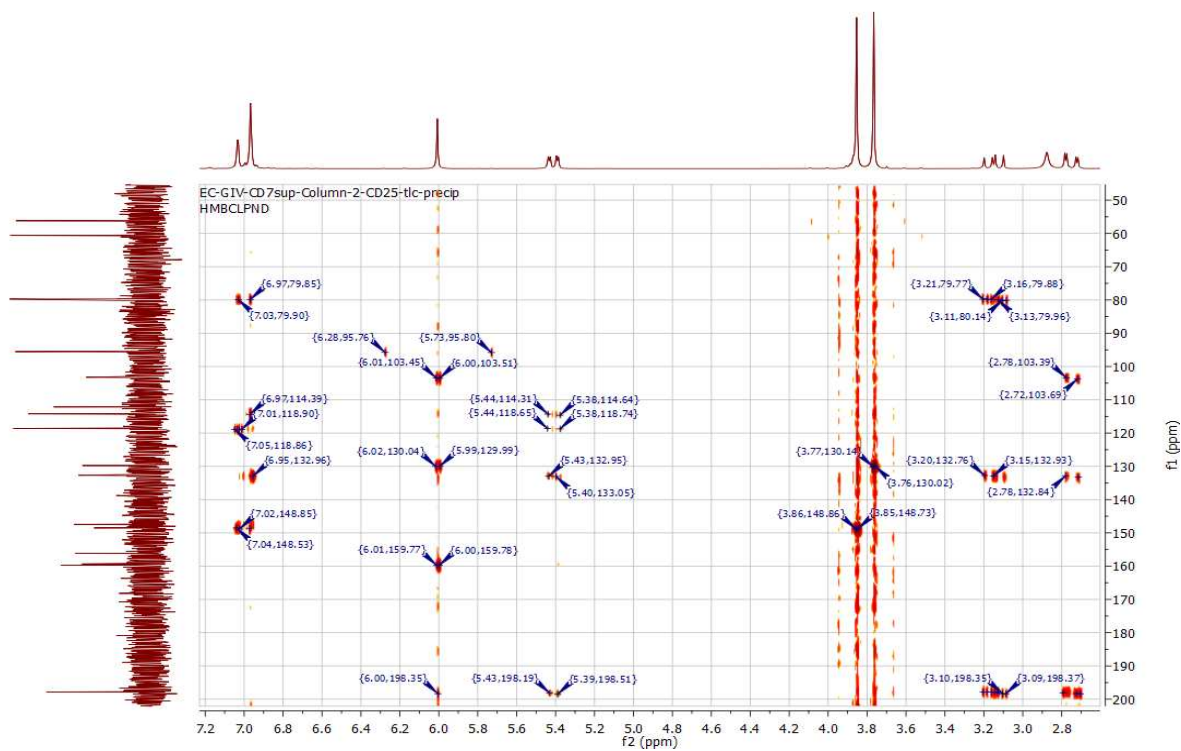

**Figure S1d. NOESY Correlation Spectrum of 8.**

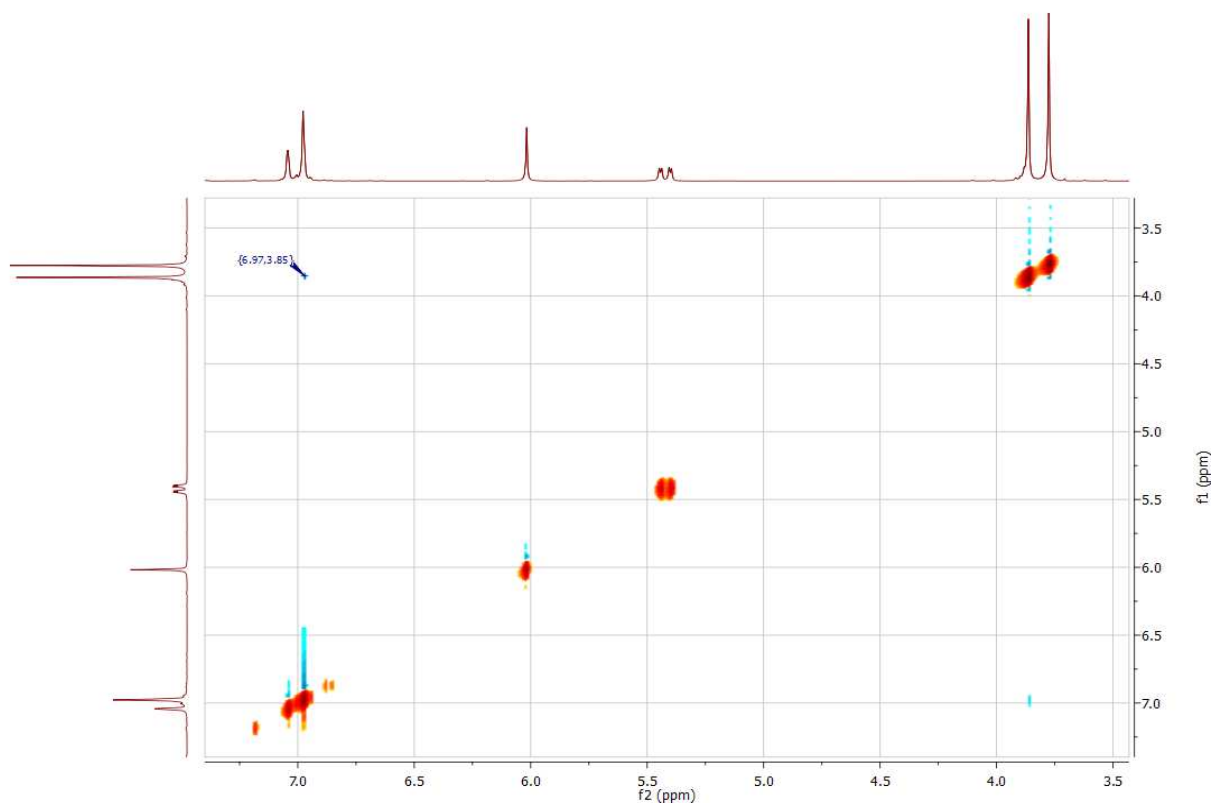

**Figure S1e. CD Spectrum of 8.**

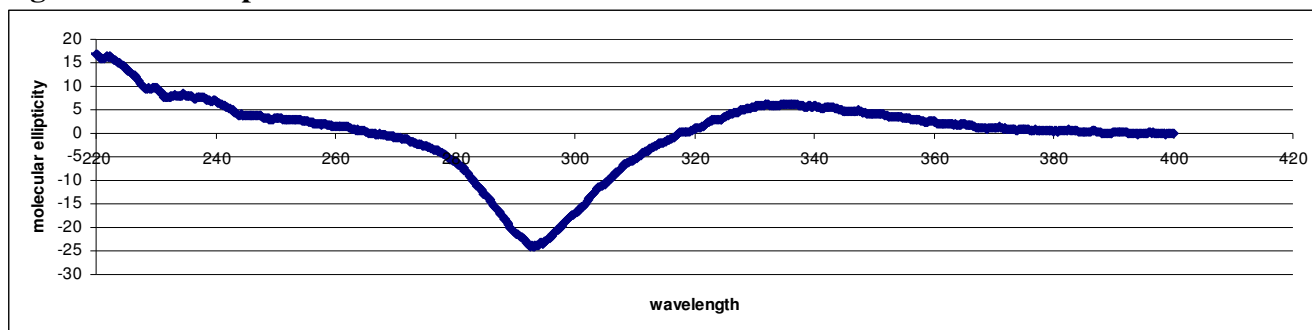

**Figure S2. CD Spectrum of 3.**

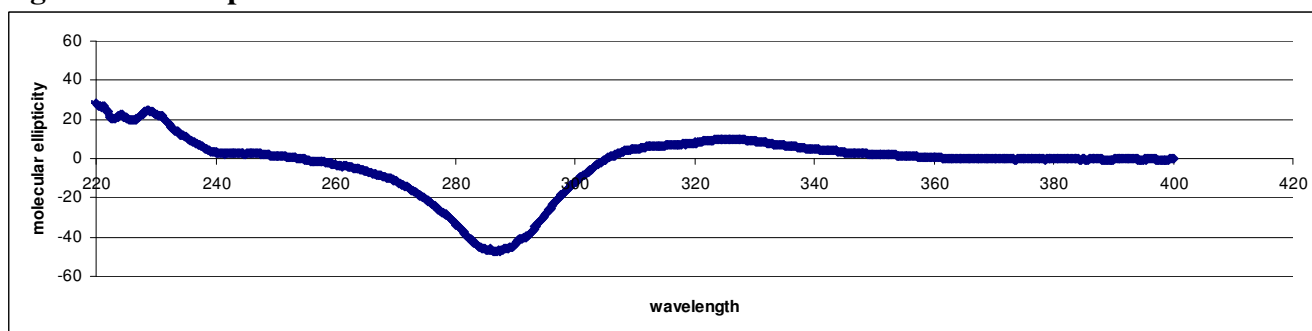

**Figure S3. CD Spectrum of 7.**

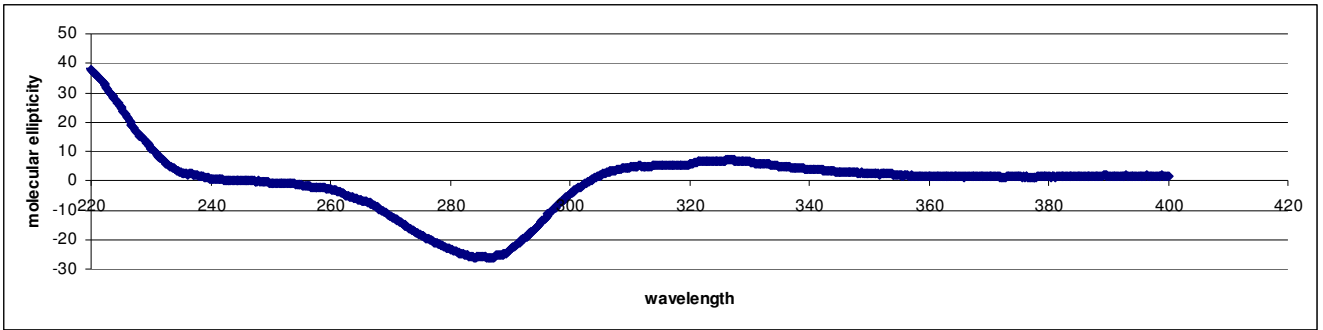

Supplement: NIHMS676434-supplement-Supportin_Information.pdf [file NIHMS676434-supplement-Supportin_Information.pdf]
